# Supplementary material
Source: ML conference proceedings conference paper supplement (https://openaccess.thecvf.com/content/CVPR2026/html/Jiang_GM-R2_Generative_Matching_CVPR_2026_paper.html)
Supplement: Supplementary file 1 [file Jiang_GM-R2_Generative_Matching_CVPR_2026_supplemental.pdf]

# Supplementary for “GM-R<sup>2</sup>: Generative Matching Learning for Unsupervised Geometric Representation and Registration”

Haobo Jiang<sup>1</sup>, Liang Yu<sup>2</sup>, Jianmin Zheng<sup>\*1</sup>

<sup>1</sup>Nanyang Technological University, Singapore, <sup>2</sup>Alibaba Group

{haobo.jiang, ASJMZheng}@ntu.edu.sg, liangyu.yl@alibaba-inc.com

## A. Theoretical Analysis of Generative Matching Learning

As demonstrated in Sec. 3.2.1 in the main manuscript, the optimization objective of our *Generative Matching Learning* under GM-R<sup>2</sup> paradigm can be formulated as the problem of maximizing the log-likelihood over the dataset  $D$  with paired point clouds  $(\mathbf{P}, \mathbf{Q})$  and corresponding RGB images  $(\mathbf{I}^P, \mathbf{I}^Q)$ :

$$\max_{\theta} \mathbb{E}_{(\mathbf{I}^P, \mathbf{I}^Q, \mathbf{P}, \mathbf{Q}) \sim \mathcal{D}} [\log p_{\omega}(\mathbf{I}^P, \mathbf{I}^Q \mid g_{\theta}(\mathbf{P}), g_{\theta}(\mathbf{Q}))]. \quad (1)$$

In practice, we map the paired point clouds into the range maps  $\tilde{\mathbf{d}}^{PQ} = (\mathbf{d}^P, \mathbf{d}^Q)$  via our proposed AFoV-ERP, and the coupled latent image representation of the paired images can be represented as  $\tilde{\mathbf{x}}^{PQ} = [\tilde{\mathbf{x}}^P; \tilde{\mathbf{x}}^Q]$ . Moreover, we leverage the ControlNet encoder as the geometric feature encoder  $g_{\theta}(\cdot)$ . Consequently, the log-likelihood optimization objective can be rewritten as:  $\mathbb{E}_{p_{data}} [\log p_{\omega}(\tilde{\mathbf{x}}^{PQ} \mid \text{CN}_{\text{enc}}(\tilde{\mathbf{d}}^{PQ}; \theta))]$ .

Our diffusion process progressively introduces the Gaussian noise into this clean image pair, which gradually converts them into the noise distribution  $\mathbf{x}_T^{PQ} \sim \mathcal{N}(\mathbf{0}, \mathbf{I})$ , forming a Markov chain  $\mathbf{x}^{PQ} = \mathbf{x}_0^{PQ} \rightarrow \mathbf{x}_1^{PQ} \dots \rightarrow \mathbf{x}_T^{PQ}$ . As demonstrated in [2], the random variable  $\mathbf{x}_t^{PQ} \sim q(\mathbf{x}_t^{PQ} \mid \mathbf{x}_{t-1}^{PQ}) := \mathcal{N}(\mathbf{x}_t^{PQ}; \sqrt{1 - \beta_t} \mathbf{x}_{t-1}^{PQ}, \beta_t \mathbf{I})$  can also be expressed in a closed form  $\mathbf{x}_t^{PQ} \sim q(\mathbf{x}_t^{PQ} \mid \mathbf{x}_0^{PQ})$ , which can be formulated as follows:

$$\mathbf{x}_t^{PQ} \sim \mathcal{N}(\mathbf{x}_t^{PQ}; \sqrt{\bar{\alpha}_t} \mathbf{x}_0^{PQ}, (1 - \bar{\alpha}_t) \mathbf{I}). \quad (2)$$

Here, the diffusion coefficients  $\bar{\alpha}_t = \prod_{s=0}^t \alpha_s = \prod_{s=0}^t (1 - \beta_s)$ , and  $\beta_s$  indicates the noise coefficient determined by such as a linear schedule [2] or a cosine schedule [3]. Then, the variational lower bound of the log-likelihood optimization objective can be represented as:

$$\begin{aligned} & \mathbb{E}_{p_{data}} [\log p_{\omega}(\tilde{\mathbf{x}}^{PQ} \mid \text{CN}_{\text{enc}}(\tilde{\mathbf{d}}^{PQ}; \theta))] \\ & \geq \mathbb{E}_{p_{data}, q(\tilde{\mathbf{x}}_{1:T}^{PQ} \mid \tilde{\mathbf{x}}_0^{PQ})} \left[ \log \frac{p_{\omega}(\tilde{\mathbf{x}}_{0:T}^{PQ} \mid \text{CN}_{\text{enc}}(\tilde{\mathbf{d}}^{PQ}; \theta))}{q(\tilde{\mathbf{x}}_{1:T}^{PQ} \mid \tilde{\mathbf{x}}_0^{PQ})} \right] \\ & = \mathbb{E}_{p_{data}, q(\tilde{\mathbf{x}}_{1:T}^{PQ} \mid \tilde{\mathbf{x}}_0^{PQ})} \left[ \log \frac{p(\tilde{\mathbf{x}}_T^{PQ}) \prod_{t=1}^T p_{\omega}(\tilde{\mathbf{x}}_{t-1}^{PQ} \mid \tilde{\mathbf{x}}_t^{PQ}, \text{CN}_{\text{enc}}(\tilde{\mathbf{d}}^{PQ}; \theta))}{\prod_{t=1}^T q(\tilde{\mathbf{x}}_t^{PQ} \mid \tilde{\mathbf{x}}_{t-1}^{PQ})} \right] \\ & = \mathbb{E}_{p_{data}, q(\tilde{\mathbf{x}}_{1:T}^{PQ} \mid \tilde{\mathbf{x}}_0^{PQ})} \left[ \log \frac{p(\tilde{\mathbf{x}}_T^{PQ}) p_{\omega}(\tilde{\mathbf{x}}_0^{PQ} \mid \tilde{\mathbf{x}}_1^{PQ}, \text{CN}_{\text{enc}}(\tilde{\mathbf{d}}^{PQ}; \theta)) \prod_{t=2}^T p_{\omega}(\tilde{\mathbf{x}}_{t-1}^{PQ} \mid \tilde{\mathbf{x}}_t^{PQ}, \text{CN}_{\text{enc}}(\tilde{\mathbf{d}}^{PQ}; \theta))}{q(\tilde{\mathbf{x}}_1^{PQ} \mid \tilde{\mathbf{x}}_0^{PQ}) \prod_{t=2}^T q(\tilde{\mathbf{x}}_t^{PQ} \mid \tilde{\mathbf{x}}_{t-1}^{PQ}, \tilde{\mathbf{x}}_0^{PQ})} \right] \\ & = \mathbb{E}_{p_{data}, q(\tilde{\mathbf{x}}_{1:T}^{PQ} \mid \tilde{\mathbf{x}}_0^{PQ})} \left[ \log \frac{p(\tilde{\mathbf{x}}_T^{PQ}) p_{\omega}(\tilde{\mathbf{x}}_0^{PQ} \mid \tilde{\mathbf{x}}_1^{PQ}, \text{CN}_{\text{enc}}(\tilde{\mathbf{d}}^{PQ}; \theta))}{q(\tilde{\mathbf{x}}_1^{PQ} \mid \tilde{\mathbf{x}}_0^{PQ})} + \log \prod_{t=2}^T \frac{p_{\omega}(\tilde{\mathbf{x}}_{t-1}^{PQ} \mid \tilde{\mathbf{x}}_t^{PQ}, \text{CN}_{\text{enc}}(\tilde{\mathbf{d}}^{PQ}; \theta))}{q(\tilde{\mathbf{x}}_t^{PQ} \mid \tilde{\mathbf{x}}_{t-1}^{PQ}, \tilde{\mathbf{x}}_0^{PQ})} \right] \\ & = \mathbb{E}_{p_{data}, q(\tilde{\mathbf{x}}_{1:T}^{PQ} \mid \tilde{\mathbf{x}}_0^{PQ})} \left[ \log \frac{p(\tilde{\mathbf{x}}_T^{PQ}) p_{\omega}(\tilde{\mathbf{x}}_0^{PQ} \mid \tilde{\mathbf{x}}_1^{PQ}, \text{CN}_{\text{enc}}(\tilde{\mathbf{d}}^{PQ}; \theta))}{q(\tilde{\mathbf{x}}_1^{PQ} \mid \tilde{\mathbf{x}}_0^{PQ})} + \log \prod_{t=2}^T \frac{p_{\omega}(\tilde{\mathbf{x}}_{t-1}^{PQ} \mid \tilde{\mathbf{x}}_t^{PQ}, \text{CN}_{\text{enc}}(\tilde{\mathbf{d}}^{PQ}; \theta))}{\frac{q(\tilde{\mathbf{x}}_{t-1}^{PQ} \mid \tilde{\mathbf{x}}_t^{PQ}, \tilde{\mathbf{x}}_0^{PQ}) q(\tilde{\mathbf{x}}_t^{PQ} \mid \tilde{\mathbf{x}}_0^{PQ})}{q(\tilde{\mathbf{x}}_{t-1}^{PQ} \mid \tilde{\mathbf{x}}_0^{PQ})}} \right] \end{aligned} \quad (3)$$

$$\begin{aligned}
&= \mathbb{E}_{p_{data}, q(\tilde{\mathbf{x}}_{1:T}^{PQ} | \tilde{\mathbf{x}}_0^{PQ})} \left[ \log \frac{p(\tilde{\mathbf{x}}_T^{PQ}) p_{\omega}(\tilde{\mathbf{x}}_0^{PQ} | \tilde{\mathbf{x}}_1^{PQ}, \text{CN}_{\text{enc}}(\tilde{\mathbf{d}}^{PQ}; \boldsymbol{\theta}))}{q(\tilde{\mathbf{x}}_1^{PQ} | \tilde{\mathbf{x}}_0^{PQ})} + \log \prod_{t=2}^T \frac{p_{\omega}(\tilde{\mathbf{x}}_{t-1}^{PQ} | \tilde{\mathbf{x}}_t^{PQ}, \text{CN}_{\text{enc}}(\tilde{\mathbf{d}}^{PQ}; \boldsymbol{\theta}))}{\frac{q(\tilde{\mathbf{x}}_{t-1}^{PQ} | \tilde{\mathbf{x}}_t^{PQ}, \tilde{\mathbf{x}}_0^{PQ}) q(\tilde{\mathbf{x}}_t^{PQ} | \tilde{\mathbf{x}}_0^{PQ})}{q(\tilde{\mathbf{x}}_{t-1}^{PQ} | \tilde{\mathbf{x}}_0^{PQ})}} \right] \\
&= \mathbb{E}_{p_{data}, q(\tilde{\mathbf{x}}_{1:T}^{PQ} | \tilde{\mathbf{x}}_0^{PQ})} \left[ \log \frac{p(\tilde{\mathbf{x}}_T^{PQ}) p_{\omega}(\tilde{\mathbf{x}}_0^{PQ} | \tilde{\mathbf{x}}_1^{PQ}, \text{CN}_{\text{enc}}(\tilde{\mathbf{d}}^{PQ}; \boldsymbol{\theta}))}{q(\tilde{\mathbf{x}}_1^{PQ} | \tilde{\mathbf{x}}_0^{PQ})} + \log \frac{q(\tilde{\mathbf{x}}_1^{PQ} | \tilde{\mathbf{x}}_0^{PQ})}{q(\tilde{\mathbf{x}}_T^{PQ} | \tilde{\mathbf{x}}_0^{PQ})} + \log \prod_{t=2}^T \frac{p_{\omega}(\tilde{\mathbf{x}}_{t-1}^{PQ} | \tilde{\mathbf{x}}_t^{PQ}, \text{CN}_{\text{enc}}(\tilde{\mathbf{d}}^{PQ}; \boldsymbol{\theta}))}{q(\tilde{\mathbf{x}}_{t-1}^{PQ} | \tilde{\mathbf{x}}_t^{PQ}, \tilde{\mathbf{x}}_0^{PQ})} \right] \\
&= \mathbb{E}_{p_{data}, q(\tilde{\mathbf{x}}_{1:T}^{PQ} | \tilde{\mathbf{x}}_0^{PQ})} \left[ \log \frac{p(\tilde{\mathbf{x}}_T^{PQ}) p_{\omega}(\tilde{\mathbf{x}}_0^{PQ} | \tilde{\mathbf{x}}_1^{PQ}, \text{CN}_{\text{enc}}(\tilde{\mathbf{d}}^{PQ}; \boldsymbol{\theta}))}{q(\tilde{\mathbf{x}}_T^{PQ} | \tilde{\mathbf{x}}_0^{PQ})} + \sum_{t=2}^T \log \frac{p_{\omega}(\tilde{\mathbf{x}}_{t-1}^{PQ} | \tilde{\mathbf{x}}_t^{PQ}, \text{CN}_{\text{enc}}(\tilde{\mathbf{d}}^{PQ}; \boldsymbol{\theta}))}{q(\tilde{\mathbf{x}}_{t-1}^{PQ} | \tilde{\mathbf{x}}_t^{PQ}, \tilde{\mathbf{x}}_0^{PQ})} \right] \\
&= \mathbb{E}_{p_{data}, q(\tilde{\mathbf{x}}_{1:T}^{PQ} | \tilde{\mathbf{x}}_0^{PQ})} \left[ \log \frac{p(\tilde{\mathbf{x}}_T^{PQ}) p_{\omega}(\tilde{\mathbf{x}}_0^{PQ} | \tilde{\mathbf{x}}_1^{PQ}, \text{CN}_{\text{enc}}(\tilde{\mathbf{d}}^{PQ}; \boldsymbol{\theta}))}{q(\tilde{\mathbf{x}}_T^{PQ} | \tilde{\mathbf{x}}_0^{PQ})} + \sum_{t=2}^T \log \frac{p_{\omega}(\tilde{\mathbf{x}}_{t-1}^{PQ} | \tilde{\mathbf{x}}_t^{PQ}, \text{CN}_{\text{enc}}(\tilde{\mathbf{d}}^{PQ}; \boldsymbol{\theta}))}{q(\tilde{\mathbf{x}}_{t-1}^{PQ} | \tilde{\mathbf{x}}_t^{PQ}, \tilde{\mathbf{x}}_0^{PQ})} \right] \\
&= \mathbb{E} \left[ \log p_{\omega}(\tilde{\mathbf{x}}_0^{PQ} | \tilde{\mathbf{x}}_1^{PQ}, \text{CN}_{\text{enc}}(\tilde{\mathbf{d}}^{PQ}; \boldsymbol{\theta})) \right] + \mathbb{E}_{q(\tilde{\mathbf{x}}_T^{PQ} | \tilde{\mathbf{x}}_0^{PQ})} \left[ \log \frac{p(\tilde{\mathbf{x}}_T^{PQ})}{q(\tilde{\mathbf{x}}_T^{PQ} | \tilde{\mathbf{x}}_0^{PQ})} \right] + \sum_2^T \mathbb{E}_{q(\tilde{\mathbf{x}}_t^{PQ}, \tilde{\mathbf{x}}_{t-1}^{PQ} | \tilde{\mathbf{x}}_0^{PQ})} \left[ \log \frac{p_{\omega}(\tilde{\mathbf{x}}_{t-1}^{PQ} | \tilde{\mathbf{x}}_t^{PQ}, \text{CN}_{\text{enc}}(\tilde{\mathbf{d}}^{PQ}; \boldsymbol{\theta}))}{q(\tilde{\mathbf{x}}_{t-1}^{PQ} | \tilde{\mathbf{x}}_t^{PQ}, \tilde{\mathbf{x}}_0^{PQ})} \right] \\
&= \mathbb{E} \left[ \log p_{\omega}(\tilde{\mathbf{x}}_0^{PQ} | \tilde{\mathbf{x}}_1^{PQ}, \text{CN}_{\text{enc}}(\tilde{\mathbf{d}}^{PQ}; \boldsymbol{\theta})) - \text{D}_{\text{KL}}(q(\tilde{\mathbf{x}}_T^{PQ} | \tilde{\mathbf{x}}_0^{PQ}) || p(\tilde{\mathbf{x}}_T^{PQ})) - \sum_{t>1} \text{D}_{\text{KL}}(q(\tilde{\mathbf{x}}_{t-1}^{PQ} | \tilde{\mathbf{x}}_t^{PQ}, \tilde{\mathbf{x}}_0^{PQ}) || p_{\omega}(\tilde{\mathbf{x}}_{t-1}^{PQ} | \tilde{\mathbf{x}}_t^{PQ}, \text{CN}_{\text{enc}}(\tilde{\mathbf{d}}^{PQ}; \boldsymbol{\theta})) \right], \tag{4}
\end{aligned}$$

where the third term is the core loss (termed denoising matching loss) for denoising network training. As derived in [2], the posterior distribution  $q(\tilde{\mathbf{x}}_{t-1}^{PQ} | \tilde{\mathbf{x}}_t^{PQ}, \tilde{\mathbf{x}}_0^{PQ})$  can be formulated as:

$$q(\tilde{\mathbf{x}}_{t-1}^{PQ} | \tilde{\mathbf{x}}_t^{PQ}, \tilde{\mathbf{x}}_0^{PQ}) = \mathcal{N} \left( \tilde{\mathbf{x}}_{t-1}^{PQ}; \frac{\sqrt{\bar{\alpha}_{t-1}} \beta_t}{1 - \bar{\alpha}_t} \tilde{\mathbf{x}}_0^{PQ} + \frac{\sqrt{\bar{\alpha}_t} (1 - \bar{\alpha}_{t-1})}{1 - \bar{\alpha}_t} \tilde{\mathbf{x}}_t^{PQ}, \tilde{\beta} \mathbf{I} \right). \tag{5}$$

Furthermore, through the reparameterization trick,  $\tilde{\mathbf{x}}_0^{PQ} = \frac{\tilde{\mathbf{x}}_t^{PQ} - \sqrt{1 - \bar{\alpha}_t} \epsilon_0}{\sqrt{\bar{\alpha}_t}}$  ( $\epsilon_0 \sim \mathcal{N}(\mathbf{0}, \mathbf{I})$ ), Eq. 5 can be rewritten as:

$$q(\tilde{\mathbf{x}}_{t-1}^{PQ} | \tilde{\mathbf{x}}_t^{PQ}, \tilde{\mathbf{x}}_0^{PQ}) = \mathcal{N} \left( \tilde{\mathbf{x}}_{t-1}^{PQ}; \frac{1}{\sqrt{\alpha_t}} \tilde{\mathbf{x}}_t^{PQ} - \frac{1 - \alpha_t}{\sqrt{1 - \bar{\alpha}_t} \sqrt{\alpha_t}} \epsilon_0, \tilde{\beta} \mathbf{I} \right). \tag{6}$$

Also, the denoising network (i.e., prior distribution) can be modeled as:

$$p_{\omega}(\tilde{\mathbf{x}}_{t-1}^{PQ} | \tilde{\mathbf{x}}_t^{PQ}, \text{CN}_{\text{enc}}(\tilde{\mathbf{d}}^{PQ}; \boldsymbol{\theta})) = \mathcal{N} \left( \tilde{\mathbf{x}}_{t-1}^{PQ}; \frac{1}{\sqrt{\alpha_t}} \tilde{\mathbf{x}}_t^{PQ} - \frac{1 - \alpha_t}{\sqrt{1 - \bar{\alpha}_t} \sqrt{\alpha_t}} \epsilon_{\omega}(\tilde{\mathbf{x}}_t^{PQ}, t, \text{CN}_{\text{enc}}(\tilde{\mathbf{d}}^{PQ}; \boldsymbol{\theta})), \tilde{\beta} \mathbf{I} \right). \tag{7}$$

Consequently, minimizing the KL divergence between the posterior distribution and the prior distribution in the denoising matching loss is equivalent to optimizing the parameters of noise network  $\epsilon_{\theta}(\tilde{\mathbf{x}}_t^{PQ}, t, \text{CN}_{\text{enc}}(\tilde{\mathbf{d}}^{PQ}; \boldsymbol{\theta}))$  to approach noise  $\epsilon_0$ . The final loss function can be formulated as:

$$\mathcal{L} = \mathbb{E} \left[ \left\| \epsilon_{\omega}(\tilde{\mathbf{x}}_t^{PQ}, t, \text{CN}_{\text{enc}}(\tilde{\mathbf{d}}^{PQ}; \boldsymbol{\theta})) - \epsilon_0 \right\|_2^2 \right], \tag{8}$$

which is equivalent to our practical denoising losses as in Eq. 12 in our manuscript.

## B. More Visualization Results

In Fig. 1, we provide more qualitative comparison results on challenging low-overlap cases from ScanNet dataset [1].

## References

- [1] Angela Dai, Angel X Chang, Manolis Savva, Maciej Halber, Thomas Funkhouser, and Matthias Nießner. Scannet: Richly-annotated 3d reconstructions of indoor scenes. In *CVPR*, 2017. 2, 3
- [2] Jonathan Ho, Ajay Jain, and Pieter Abbeel. Denoising diffusion probabilistic models. *NeurIPS*, 2020. 1, 2
- [3] Alexander Quinn Nichol and Prafulla Dhariwal. Improved denoising diffusion probabilistic models. In *ICML*, 2021. 1
- [4] Runzhao Yao, Shaoyi Du, Wenting Cui, Canhui Tang, and Chengwu Yang. Pare-net: Position-aware rotation-equivariant networks for robust point cloud registration. In *ECCV*, 2024. 3

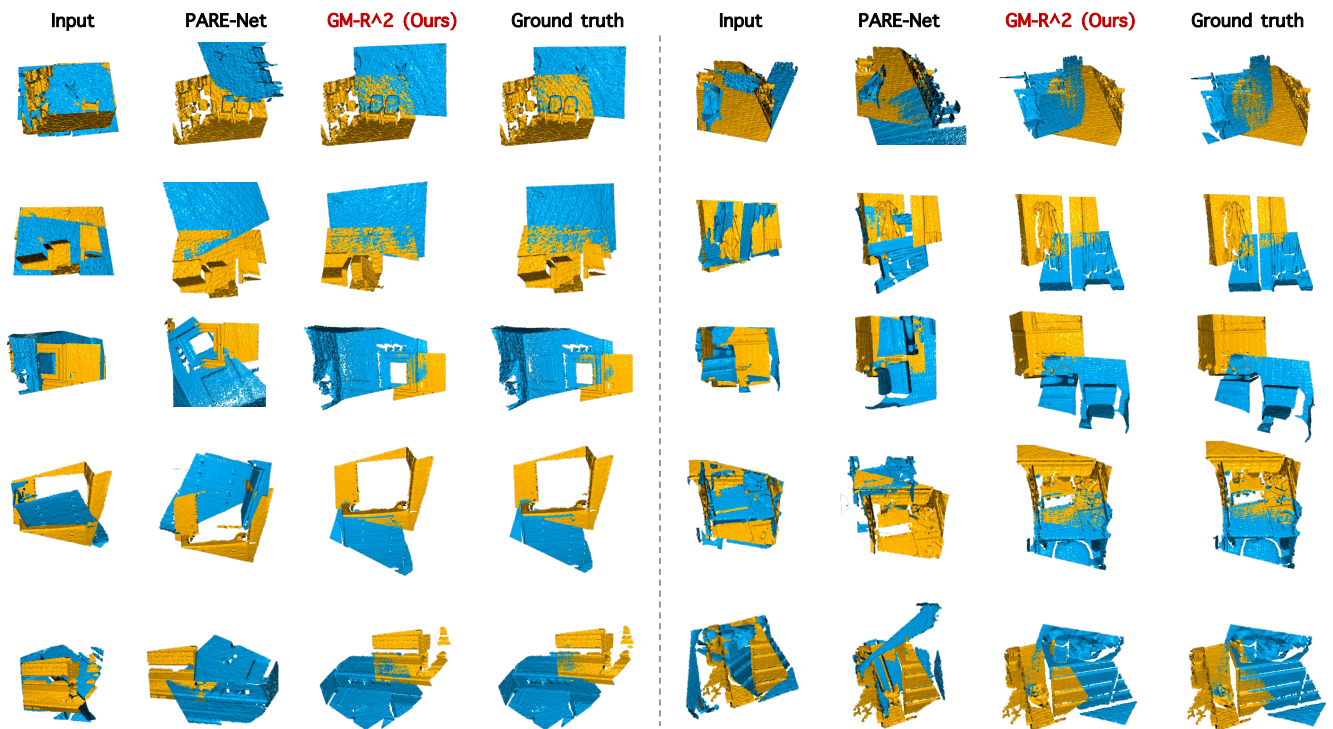

Figure 1. Qualitative comparison between the SOTA fully-supervised deep descriptor PARE-Net [4] and our unsupervised GM-R<sup>2</sup> descriptor in challenging low-overlap cases from **ScanNet** [1]. Our unsupervised method visually presents higher alignment precision.
